# Supplementary material for: Active zone protein SYD-2/Liprin-α acts downstream of LRK-1/LRRK2 to regulate polarized trafficking of synaptic vesicle precursors through clathrin adaptor protein complexes
Source: PubMed Central journal article supplement — bioRxiv. 2023 Feb 26:2023.02.26.530068. Preprint. [Version 1] doi: 10.1101/2023.02.26.530068 (PMC9980171; doi:10.1101/2023.02.26.530068), 2023-02-26
Supplement: media-1.pdf [file media-1.pdf]

**Supplementary Table 1: List of strains**

| S.No | Strain number | Genotype                                                           | Reference                                  |
|------|---------------|--------------------------------------------------------------------|--------------------------------------------|
| 1    | N2            | Bristol wild type                                                  | (Brenner, 1974)                            |
| 2    | NM2689        | <i>jsIs821</i> [ <i>mec-7p::gfp::rab-3</i> ]                       | (Bounoutas <i>et al.</i> , 2009)           |
| 3    | TT1555        | <i>tbEx254</i> [ <i>mec-7p::aman-II::mCherry</i> ]; <i>jsIs821</i> | (Choudhary <i>et al.</i> , 2017)           |
| 4    | TT2884        | <i>tbIs388</i> [ <i>mec-4p::sng-1::egfp</i> ]                      | This study                                 |
| 5    | TT2903        | <i>tbIs381</i> [ <i>mec-4p::ctns-1::mCherry</i> ]                  | This study                                 |
| 6    | TT3029        | <i>pwSi113</i> [ <i>mec-7p::mScarlet::rab-7::let858</i> ] G418R    | Barth Grant, this study                    |
| 7    | TT3007        | <i>tbIs414</i> [ <i>mec-7p::snb-1::egfp</i> ]                      | This study                                 |
| 8    | TT1884        | <i>tbIs227</i> [ <i>mec-4p::mCherry::rab-3</i> ]                   | (Choudhary <i>et al.</i> , 2017)           |
| 9    | NM664         | <i>jsIs37</i> [ <i>mec-7p::snb-1::gfp</i> ]                        | (Nonet, 1999)                              |
| 10   | TT2710        | <i>tbEx364</i> [ <i>mec-4p::sng-1::egfp</i> ]                      | This study                                 |
| 11   | TT1519        | <i>tbEx272</i>                                                     | This study                                 |
| 12   | TT2918        | <i>tbEx384</i>                                                     | This study                                 |
| 13   | TT3286        | <i>rab-7::mNeonGreen</i> ; <i>tbIs381</i>                          | Barth Grant, this study                    |
| 14   | TT3035        | <i>pwSi225</i> [ <i>mec-7p::lmp-1::mNeonGreen::let858</i> ]; hygR  | Barth Grant, this study                    |
| 15   | NM2156        | <i>kyIs105</i> ( <i>str-3p::SNB-1::GFP</i> )                       | This study                                 |
| 16   | TT2636        | <i>tbEx316</i> [ <i>str-3p::ctns-1::mCherry</i> ]                  | This study                                 |
| 17   | TT1893        | <i>oqEx</i> [ <i>unc-101p::unc-101::gfp+pRF4</i> ]                 | (Kaplan <i>et al.</i> , 2010)              |
| 18   | TT2052        | <i>kyEx3233</i> [ <i>des2p::ebp-2::gfp</i> ]                       | (Maniar <i>et al.</i> , 2012)              |
| 19   | TT1612        | <i>kyIs156</i> [ <i>str-1p::odr-10::gfp</i> ]                      | (Dwyer <i>et al.</i> , 2001)               |
| 20   | TT3371        | <i>tbEx486</i> [ <i>rab-3p::apb-3::gfp</i> ]                       | This study                                 |
| 21   | TT1218        | <i>lrk-1(km17)</i>                                                 | (Sakaguchi-Nakashima <i>et al.</i> , 2007) |
| 22   | TT1225        | <i>lrk-1(km41)</i>                                                 | (Sakaguchi-Nakashima <i>et al.</i> , 2007) |
| 23   | TT2060        | <i>apb-3(ok429)</i>                                                | (Consortium, 2012)                         |
| 24   | TT1134        | <i>syd-2(ok217)</i>                                                | (Consortium, 2012)                         |
| 25   | TT148         | <i>syd-2(ju37)</i>                                                 | (Zhen and Jin, 1999)                       |
| 26   | TT385         | <i>unc-104(e1265tb120)</i>                                         | (Kumar <i>et al.</i> , 2010)               |
| 27   | TT1211        | <i>unc-101(m1)</i>                                                 | (Lee, Jongeward and Sternberg, 1994)       |

**Supplementary Table 2: List of plasmids**

| Strain name      | Details                                                                                                                       | Plasmid | Plasmid details                                                                                                                                                                             | Source                                                                                                       |
|------------------|-------------------------------------------------------------------------------------------------------------------------------|---------|---------------------------------------------------------------------------------------------------------------------------------------------------------------------------------------------|--------------------------------------------------------------------------------------------------------------|
| 1 <i>tbEx272</i> | Generated by injecting TTpl509 (5 ng/μL) with <i>myo-2p::gfp</i> (50 ng/μL) as coinjection marker.                            | TTpl509 | <i>mec-4p::ctns-1::mCherry. unc-129p</i> in KG#371 was replaced with <i>mec-4p</i> using HindIII and BamHI restriction sites.                                                               | This study. (Edwards <i>et al.</i> , 2013) KG#371 was a gift from K G Miller.                                |
| 2 <i>tbEx369</i> | Generated by injecting TTpl509 (20 ng/μL) with <i>myo-2p::gfp::h2b</i> (TTpl592) (40 ng/μL) as coinjection marker.            |         |                                                                                                                                                                                             |                                                                                                              |
| 3 <i>tbEx364</i> | Generated by injecting TTpl696 (5 ng/μL) with <i>myo-2p::mCherry</i> (TTpl580) (10 ng/μL) as coinjection marker.              | TTpl696 | <i>mec-4p::sng-1::gfp. SNG-1::GFP</i> was amplified from NM491 and cloned into a <i>mec-4p</i> containing vector using NheI and EcoRV restriction sites.                                    | This study. NM491 [pSY3 (SNG-1::GFP construct)]. (Zhao and Nonet, 2001) NM491 was a gift from Michael Nonet. |
| 4 <i>tbEx316</i> | Generated by injecting TTpl653 (20 ng/μL) with <i>unc-122p::gfp</i> (TTpl572) (30 ng/μL) as coinjection marker.               | TTpl635 | <i>str-3p::ctns-1::mCherry. mec-4p</i> from TTpl509 was switched out for <i>str-3p</i> using BamHI and ApaI restriction sites.                                                              | This study. TTpl572 was a gift from Kavita Babu.                                                             |
| 5 <i>tbEx486</i> | Generated by injecting TTpl796 (Isolate 2) (30 ng/μL) with <i>myo-2p::mCherry</i> (TTpl580) (10 ng/μL) as coinjection marker. | TTpl796 | <i>rab-3p::apb-3::gfp. APB-3</i> was amplified from genomic DNA using Phusion Polymerase and cloned into a <i>rab-3p</i> containing vector (TTpl698) using NheI and AgeI restriction sites. | This study.                                                                                                  |
| 6 <i>tbEx384</i> | Generated by injecting TTpl684 (10 ng/μL) with <i>myo-2p::mCherry</i> (TTpl580) (10 ng/μL) as coinjection marker.             | TTpl684 | <i>mec-4p::snb-1::gfp</i>                                                                                                                                                                   | This study. Plasmid was a gift from Michael Nonet.                                                           |

**Supplementary Table 3: (Associated with Fig. 2A)**

---

**Fraction of SNG-1 co-migrating with RAB-3**

---

| <b>Genotype</b>                                 | <b>P-value</b> | <b>Significant</b> |
|-------------------------------------------------|----------------|--------------------|
| <b>One Way ANOVA with Tukey's post Hoc test</b> |                |                    |
| WT vs <i>lrk-1</i>                              | 0.04           | Yes                |
| WT vs <i>apb-3</i>                              | 0.13           | No                 |
| <i>lrk-1</i> vs <i>apb-3</i>                    | 1.4E-05        | Yes                |

---

**Supplementary Table 4: (Associated with Fig. 2B)**

| <b>Fraction of SNG-1 co-migrating with CTNS-1</b> |                |                    |
|---------------------------------------------------|----------------|--------------------|
| <b>Genotype</b>                                   | <b>P-value</b> | <b>Significant</b> |
| <b>Mann-Whitney Test</b>                          |                |                    |
| WT vs <i>lrk-1(km17)</i>                          | 3.2E-08        | Yes                |
| WT vs <i>apb-3(ok429)</i>                         | 9.2E-09        | Yes                |
| WT vs <i>lrk-1(km17) apb-3</i>                    | 1.4E-07        | Yes                |
| <i>lrk-1(km17)</i> vs <i>lrk-1 apb-3</i>          | 0.26           | No                 |
| WT vs <i>lrk-1(km41)</i>                          | 2.9E-07        | Yes                |
| <i>lrk-1(km17)</i> vs <i>lrk-1(km41)</i>          | 0.008          | Yes                |
| <b>One Way ANOVA with Tukey's post Hoc test</b>   |                |                    |
| <i>apb-3</i> vs <i>lrk-1(km17) apb-3</i>          | 0.062          | No                 |
| <i>lrk-1(km41)</i> vs <i>apb-3</i>                | 0.58           | No                 |

**Supplementary Table 5: (Associated with Fig. S2B)**

| <b>Fraction of CTNS-1 co-migrating with SNG-1</b>          |                |                    |
|------------------------------------------------------------|----------------|--------------------|
| <b>Genotype</b>                                            | <b>P-value</b> | <b>Significant</b> |
| <b>Mann-Whitney Test</b>                                   |                |                    |
| WT vs <i>lrk-1(km17)</i>                                   | 0.33           | No                 |
| WT vs <i>lrk-1(km41)</i>                                   | 0.06           | No                 |
| WT vs <i>apb-3(ok429)</i>                                  | 0.60           | No                 |
| WT vs <i>lrk-1 apb-3</i>                                   | 0.07           | No                 |
| <i>lrk-1(km17)</i> vs <i>lrk-1 apb-3</i>                   | 0.15           | No                 |
| <i>lrk-1(km17)</i> vs <i>lrk-1 apb-3; syd-2</i>            | 0.03           | Yes                |
| <i>apb-3</i> vs <i>apb-3; syd-2(ok217)</i>                 | 0.86           | No                 |
| WT vs <i>syd-2(ju37)</i>                                   | 0.063          | No                 |
| WT vs <i>apb-3; syd-2(ju37)</i>                            | 0.0056         | Yes                |
| WT vs <i>lrk-1; syd-2(ju37)</i>                            | 0.0016         | Yes                |
| <i>syd-2(ju37)</i> vs <i>apb-3; syd-2(ju37)</i>            | 0.23           | No                 |
| <i>syd-2(ju37)</i> vs <i>lrk-1; syd-2(ju37)</i>            | 0.09           | No                 |
| WT vs <i>unc-104(e1265tb120)</i>                           | 0.23           | No                 |
| WT vs <i>lrk-1; unc-104(e1265tb120)</i>                    | 0.09           | No                 |
| WT vs <i>apb-3; unc-104(e1265tb120)</i>                    | 0.03           | Yes                |
| WT vs <i>unc-104(e1265tb120); syd-2(ok217)</i>             | 0.03           | Yes                |
| <i>lrk-1(km17)</i> vs <i>lrk-1; unc-104(e1265tb120)</i>    | 0.3            | No                 |
| <i>apb-3(ok429)</i> vs <i>apb-3; unc-104(e1265tb120)</i>   | 0.006          | Yes                |
| <i>syd-2(ok217)</i> vs <i>unc-104(e1265tb120); syd-2</i>   | 0.006          | Yes                |
| <i>unc-104(e1265tb120)</i> vs <i>unc-104; syd-2(ok217)</i> | 0.46           | No                 |
| <i>unc-104(e1265tb120)</i> vs <i>lrk-1; unc-104</i>        | 0.96           | No                 |
| <i>unc-104(e1265tb120)</i> vs <i>apb-3; unc-104</i>        | 0.42           | No                 |
| <i>lrk-1(km17)</i> vs <i>lrk-1; syd-2(ju37)</i>            | 0.0002         | Yes                |
| <i>apb-3; syd-2(ok217)</i> vs <i>apb-3; syd-2(ju37)</i>    | 0.02           | Yes                |
| <i>syd-2(ju37)</i> vs <i>unc-104(e1265tb120)</i>           | 0.78           | No                 |
| <i>syd-2(ok217)</i> vs <i>syd-2(ju37)</i>                  | 0.013          | Yes                |
| <i>apb-3</i> vs <i>lrk-1 apb-3</i>                         | 0.04           | Yes                |
| <i>apb-3</i> vs <i>lrk-1 apb-3; syd-2</i>                  | 0.01           | Yes                |
| <i>apb-3</i> vs <i>apb-3; syd-2(ju37)</i>                  | 0.00068        | Yes                |

*lrk-1; syd-2(ok217)* vs *lrk-1; syd-2(ju37)*

0.01

Yes

---

**Supplementary Table 6: (Associated with Fig. 2C)**

**Fraction of SNG-1 co-migrating with RAB-7**

| <b>Genotype</b>                                 | <b>P-value</b> | <b>Significant</b> |
|-------------------------------------------------|----------------|--------------------|
| <b>Mann-Whitney Test</b>                        |                |                    |
| WT vs <i>lrk-1 apb-3</i>                        | 5.3E-08        | Yes                |
| <i>lrk-1</i> vs <i>lrk-1 apb-3</i>              | 0.0016         | Yes                |
| <i>apb-3</i> vs <i>lrk-1 apb-3</i>              | 1.8E-06        | Yes                |
| <b>One Way ANOVA with Tukey's post Hoc test</b> |                |                    |
| WT vs <i>lrk-1(km17)</i>                        | 0              | Yes                |
| WT vs <i>apb-3(ok429)</i>                       | 1.5E-06        | Yes                |
| <i>apb-3</i> vs <i>lrk-1</i>                    | 0.019          | Yes                |

**Supplementary Table 7: (Associated with Fig. S2D)**

**Fraction of RAB-7 co-migrating with SNG-1**

| <b>Genotype</b>                     | <b>P-value</b> | <b>Significant</b> |
|-------------------------------------|----------------|--------------------|
| <b>Mann-Whitney Test</b>            |                |                    |
| WT vs <i>lrk-1</i>                  | 0.11           | No                 |
| WT vs <i>apb-3</i>                  | 0.02           | Yes                |
| WT vs <i>lrk-1 apb-3</i>            | 0.14           | No                 |
| WT vs <i>syd-2</i>                  | 0.83           | No                 |
| WT vs <i>lrk-1; syd-2</i>           | 0.02           | Yes                |
| WT vs <i>apb-3; syd-2</i>           | 0.05           | Yes                |
| <i>lrk-1</i> vs <i>lrk-1; syd-2</i> | 0.31           | No                 |
| <i>lrk-1</i> vs <i>lrk-1 apb-3</i>  | 0.57           | No                 |
| <i>apb-3</i> vs <i>apb-3; syd-2</i> | 0.98           | No                 |
| <i>apb-3</i> vs <i>lrk-1 apb-3</i>  | 0.19           | No                 |
| <i>syd-2</i> vs <i>lrk-1; syd-2</i> | 0.07           | No                 |
| <i>syd-2</i> vs <i>apb-3; syd-2</i> | 0.13           | No                 |
| <i>lrk-1</i> vs <i>apb-3</i>        | 0.56           | No                 |
| <i>lrk-1</i> vs <i>syd-2</i>        | 0.26           | No                 |
| <i>apb-3</i> vs <i>syd-2</i>        | 0.08           | No                 |



**Supplementary Table 8: (Associated with Fig. S2E)**

**Fraction of SNB-1 co-migrating with CTNS-1**

| <b>Genotype</b>              | <b>P-value</b> | <b>Significant</b> |
|------------------------------|----------------|--------------------|
| <b>Mann-Whitney Test</b>     |                |                    |
| WT vs <i>lrk-1</i>           | 0.25           | No                 |
| WT vs <i>apb-3</i>           | 0.053          | No                 |
| <i>lrk-1</i> vs <i>apb-3</i> | 0.9            | No                 |

**Supplementary Table 9: (Associated with Fig. S2F)**

| <b>Fraction of RAB-3 co-migrating with CTNS-1</b> |                |                    |
|---------------------------------------------------|----------------|--------------------|
| <b>Genotype</b>                                   | <b>P-value</b> | <b>Significant</b> |
| <b>Mann-Whitney Test</b>                          |                |                    |
| WT vs <i>lrk-1</i>                                | 0.28           | No                 |
| WT vs <i>apb-3</i>                                | 0.036          | Yes                |
| <i>lrk-1</i> vs <i>apb-3</i>                      | 0.11           | No                 |

**Supplementary Table 10: (Associated with Fig. 2H)**

| <b>Analyses of APB-3::GFP puncta - number per cell body, size and intensity</b> |                              |                |                    |
|---------------------------------------------------------------------------------|------------------------------|----------------|--------------------|
| <b>Analysis</b>                                                                 | <b>Genotype</b>              | <b>P-value</b> | <b>Significant</b> |
|                                                                                 | <b>Mann-Whitney Test</b>     |                |                    |
| Number of puncta per cell body                                                  | WT vs <i>lrk-1</i>           | 0.00008        | Yes                |
|                                                                                 | WT vs <i>syd-2</i>           | 0.00001        | Yes                |
|                                                                                 | <i>lrk-1</i> vs <i>syd-2</i> | 0.00001        | Yes                |

**Supplementary Table 11: (Associated with Fig. 2I)**

| <b>Analyses of APB-3::GFP puncta - number per cell body, size and intensity</b> |                              |                |                    |
|---------------------------------------------------------------------------------|------------------------------|----------------|--------------------|
| <b>Analysis</b>                                                                 | <b>Genotype</b>              | <b>P-value</b> | <b>Significant</b> |
|                                                                                 | <b>Mann-Whitney Test</b>     |                |                    |
| Average size of puncta                                                          | WT vs <i>lrk-1</i>           | 0.00252        | Yes                |
|                                                                                 | WT vs <i>syd-2</i>           | 0.00386        | Yes                |
|                                                                                 | <i>lrk-1</i> vs <i>syd-2</i> | 0.00001        | Yes                |

**Supplementary Table 12: (Associated with Fig. 2J)**

| <b>Analyses of APB-3::GFP puncta - number per cell body, size and intensity</b> |                              |                |                    |
|---------------------------------------------------------------------------------|------------------------------|----------------|--------------------|
| <b>Analysis</b>                                                                 | <b>Genotype</b>              | <b>P-value</b> | <b>Significant</b> |
| <b>Mann-Whitney Test</b>                                                        |                              |                |                    |
| Average mean puncta intensity to                                                | WT vs <i>lrk-1</i>           | 0.03486        | Yes                |
| cytosolic intensity per cell body                                               | WT vs <i>syd-2</i>           | 0.00001        | Yes                |
|                                                                                 | <i>lrk-1</i> vs <i>syd-2</i> | 0.00001        | Yes                |

**Supplementary Table 13: (Associated with Fig. 3D)****Fraction of SNG-1 co-migrating with CTNS-1**

| <b>Genotype</b>                                          | <b>P-value</b> | <b>Significant</b> |
|----------------------------------------------------------|----------------|--------------------|
| <b>Mann-Whitney Test</b>                                 |                |                    |
| WT vs <i>unc-104(e1265tb120)</i>                         | 0.85           | No                 |
| WT vs <i>lrk-1; unc-104(e1265tb120)</i>                  | 0.015          | Yes                |
| WT vs <i>apb-3; unc-104(e1265tb120)</i>                  | 0.015          | Yes                |
| <i>lrk-1(km17)</i> vs <i>lrk-1; unc-104(e1265tb120)</i>  | 1.1E-06        | Yes                |
| <i>apb-3(ok429)</i> vs <i>apb-3; unc-104(e1265tb120)</i> | 7.6E-09        | Yes                |
| <i>unc-104</i> vs <i>lrk-1; unc-104(e1265tb120)</i>      | 0.005          | Yes                |
| <i>unc-104</i> vs <i>apb-3; unc-104(e1265tb120)</i>      | 0.008          | Yes                |

**Supplementary Table 14: (Associated with Fig. 4A)**

**Fraction of SNG-1 co-migrating with CTNS-1**

| <b>Genotype</b>                                         | <b>P-value</b> | <b>Significant</b> |
|---------------------------------------------------------|----------------|--------------------|
| <b>Mann-Whitney Test</b>                                |                |                    |
| WT vs <i>syd-2(ok217)</i>                               | 0.29           | No                 |
| WT vs <i>lrk-1; syd-2(ok217)</i>                        | 7.4E-08        | Yes                |
| WT vs <i>apb-3; syd-2(ok217)</i>                        | 3.6E-01        | Yes                |
| WT vs <i>lrk-1 apb-3; syd-2</i>                         | 7.2E-08        | Yes                |
| <i>lrk-1(km17)</i> vs <i>lrk-1; syd-2(ok217)</i>        | 0.047          | Yes                |
| <i>lrk-1(km17)</i> vs <i>lrk-1 apb-3; syd-2</i>         | 0.11           | No                 |
| <i>apb-3</i> vs <i>apb-3; syd-2(ok217)</i>              | 4.4E-09        | Yes                |
| WT vs <i>syd-2(ju37)</i>                                | 0.39           | No                 |
| WT vs <i>apb-3; syd-2(ju37)</i>                         | 0.007          | Yes                |
| WT vs <i>lrk-1; syd-2(ju37)</i>                         | 5.6E-06        | Yes                |
| <i>syd-2(ju37)</i> vs <i>apb-3; syd-2(ju37)</i>         | 0.03           | Yes                |
| <i>syd-2(ju37)</i> vs <i>lrk-1; syd-2(ju37)</i>         | 2.5E-05        | Yes                |
| <i>lrk-1(km17)</i> vs <i>lrk-1; syd-2(ju37)</i>         | 0.98           | No                 |
| <i>apb-3; syd-2(ok217)</i> vs <i>apb-3; syd-2(ju37)</i> | 0.04           | Yes                |
| <i>syd-2(ok217)</i> vs <i>syd-2(ju37)</i>               | 0.01           | Yes                |
| <b>One Way ANOVA with Tukey's post Hoc test</b>         |                |                    |
| <i>apb-3</i> vs <i>lrk-1 apb-3</i>                      | 0.062          | No                 |
| <i>apb-3</i> vs <i>lrk-1 apb-3; syd-2</i>               | 0.25           | No                 |
| <i>apb-3</i> vs <i>apb-3; syd-2(ju37)</i>               | 7.9E-07        | Yes                |
| <i>lrk-1; syd-2(ok217)</i> vs <i>lrk-1; syd-2(ju37)</i> | 0.025          | Yes                |
| <i>lrk-1 apb-3</i> vs <i>lrk-1 apb-3; syd-2(ok217)</i>  | 0.4734         | No                 |

**Supplementary Table 15: (Associated with Fig. 4B)****Fraction of SNG-1 co-migrating with RAB-7**

| <b>Genotype</b>                                 | <b>P-value</b> | <b>Significant</b> |
|-------------------------------------------------|----------------|--------------------|
| <b>Mann-Whitney Test</b>                        |                |                    |
| WT vs <i>apb-3</i> ; <i>syd-2</i>               | 0.56           | No                 |
| <i>apb-3</i> vs <i>apb-3</i> ; <i>syd-2</i>     | 0.006          | Yes                |
| <i>syd-2</i> vs <i>apb-3</i> ; <i>syd-2</i>     | 0.11           | No                 |
| <b>One Way ANOVA with Tukey's post Hoc test</b> |                |                    |
| WT vs <i>syd-2(ok217)</i>                       | 0.88           | No                 |
| <i>syd-2</i> vs <i>lrk-1</i>                    | 0              | Yes                |
| <i>syd-2</i> vs <i>apb-3</i>                    | 9.1E-08        | Yes                |
| WT vs <i>lrk-1</i> ; <i>syd-2</i>               | 6.9E-09        | Yes                |
| <i>lrk-1</i> ; <i>syd-2</i> vs <i>lrk-1</i>     | 7.3E-01        | Yes                |
| <i>lrk-1</i> ; <i>syd-2</i> vs <i>syd-2</i>     | 3.8E-07        | Yes                |



**Supplementary Table 16: (Associated with Fig. S3C)**

| <b>Percentage vesicles co-migrating CTNS-1 and SNB-1</b> |                          |                    |
|----------------------------------------------------------|--------------------------|--------------------|
| <b>Genotype</b>                                          | <b>P-value</b>           | <b>Significant</b> |
|                                                          | <b>Mann-Whitney test</b> |                    |
| WT vs <i>syd-2</i>                                       | 0.39                     | No                 |

**Supplementary Table 17: (Associated with Fig. S3D)**

| <b>Percentage vesicles co-migrating CTNS-1 and RAB-3</b> |                          |                    |
|----------------------------------------------------------|--------------------------|--------------------|
| <b>Genotype</b>                                          | <b>P-value</b>           | <b>Significant</b> |
|                                                          | <b>Mann-Whitney test</b> |                    |
| WT vs <i>syd-2</i>                                       | 1                        | No                 |

**Supplementary Table 18: (Associated with Fig. 4G)**

| <b>Percentage vesicles co-migrating SNB-1 and RAB-3</b> |                |                    |
|---------------------------------------------------------|----------------|--------------------|
| <b>Genotype</b>                                         | <b>P-value</b> | <b>Significant</b> |
| <b>One Way ANOVA with Tukey's post Hoc test</b>         |                |                    |
| WT vs <i>syd-2</i>                                      | 1.50E-08       | Yes                |

**Supplementary Table 19: (Associated with Fig. 4H)**

**Fraction of SNG-1 co-migrating with RAB-3**

| <b>Genotype</b>                                 | <b>P-value</b> | <b>Significant</b> |
|-------------------------------------------------|----------------|--------------------|
| <b>One Way ANOVA with Tukey's post Hoc test</b> |                |                    |
| WT vs <i>syd-2(ok217)</i>                       | 0.49           | No                 |
| <i>lrk-1</i> vs <i>syd-2</i>                    | 1.8E-04        | Yes                |
| <i>apb-3</i> vs <i>syd-2</i>                    | 0.78           | No                 |

**Supplementary Table 20: (Associated with Fig. 5D)**

| <b>Fraction of SNG-1 co-migrating with CTNS-1</b>          |                |                    |
|------------------------------------------------------------|----------------|--------------------|
| <b>Genotype</b>                                            | <b>P-value</b> | <b>Significant</b> |
| <b>Mann-Whitney Test</b>                                   |                |                    |
| WT vs <i>unc-104(e1265tb120); syd-2(ok217)</i>             | 0.95           | No                 |
| <i>syd-2(ok217)</i> vs <i>unc-104(e1265tb120); syd-2</i>   | 0.28           | No                 |
| <i>unc-104(e1265tb120)</i> vs <i>unc-104; syd-2(ok217)</i> | 0.57           | No                 |

**Supplementary Table 21: (Associated with Fig. 6G)**

---

**Analyses of UNC-101::GFP puncta - intensity, size and number per cell body**

---

| <b>Analysis</b>                                                    | <b>Genotype</b>           | <b>P-value</b> | <b>Significant</b> |
|--------------------------------------------------------------------|---------------------------|----------------|--------------------|
| <b>One Way ANOVA with Tukey's post Hoc test</b>                    |                           |                |                    |
| Average mean puncta intensity to cytosolic intensity per cell body | WT vs <i>syd-2(ok217)</i> | 7.1E-08        | Yes                |

---

**Supplementary Table 22: (Associated with Fig. 6H)**

| <b>Analyses of UNC-101::GFP puncta - intensity, size and number per cell body</b> |                           |                |                    |
|-----------------------------------------------------------------------------------|---------------------------|----------------|--------------------|
| <b>Analysis</b>                                                                   | <b>Genotype</b>           | <b>P-value</b> | <b>Significant</b> |
| <b>Mann-Whitney Test</b>                                                          |                           |                |                    |
| Puncta size average per cell body                                                 | WT vs <i>syd-2(ok217)</i> | 1.1E-03        | Yes                |

**Supplementary Table 23: (Associated with Suppl. Fig. S4D)**

| <b>Analyses of UNC-101::GFP puncta - intensity, size and number per cell body</b> |                           |                |                    |
|-----------------------------------------------------------------------------------|---------------------------|----------------|--------------------|
| <b>Analysis</b>                                                                   | <b>Genotype</b>           | <b>P-value</b> | <b>Significant</b> |
|                                                                                   | <b>Mann-Whitney Test</b>  |                |                    |
| Number of puncta per cell body                                                    | WT vs <i>syd-2(ok217)</i> | 0.07           | No                 |



**Supplementary Table 24: (Associated with Fig. 6J)**

| <b>Analyses of UNC-101::GFP puncta – intensity per cell body</b>   |                           |                |                    |
|--------------------------------------------------------------------|---------------------------|----------------|--------------------|
| <b>Analysis</b>                                                    | <b>Genotype</b>           | <b>P-value</b> | <b>Significant</b> |
| <b>Mann-Whitney Test</b>                                           |                           |                |                    |
| Average mean puncta intensity to cytosolic intensity per cell body | WT vs <i>syd-2(ok217)</i> | 0.033          | Yes                |

**Supplementary Table 25: (Associated with Suppl. Fig. S4F)**

| <b>Analyses of average size of UNC-101::GFP puncta per cell body</b> |                          |                |                    |
|----------------------------------------------------------------------|--------------------------|----------------|--------------------|
| <b>Analysis</b>                                                      | <b>Genotype</b>          | <b>P-value</b> | <b>Significant</b> |
|                                                                      | <b>Mann-Whitney Test</b> |                |                    |
| Number of puncta per cell body                                       | WT vs <i>syd-2(ju37)</i> | 0.134          | No                 |

**Supplementary Table 26: (Associated with Suppl. Fig. S4G)**

| <b>Analyses of intensity of UNC-101::GFP puncta per cell body</b> |                          |                |                    |
|-------------------------------------------------------------------|--------------------------|----------------|--------------------|
| <b>Analysis</b>                                                   | <b>Genotype</b>          | <b>P-value</b> | <b>Significant</b> |
|                                                                   | <b>Mann-Whitney Test</b> |                |                    |
| Number of puncta per cell body                                    | WT vs <i>syd-2(ju37)</i> | 0.97           | No                 |

Bounoutas, A., Zheng, Q., Nonet, M. L. and Chalfie, M. (2009) 'mec-15 encodes an F-box protein required for touch receptor neuron mechanosensation, synapse formation and development', *Genetics*, 183(2), pp. 607-4SI.

Brenner, S. (1974) 'The genetics of *Caenorhabditis elegans*', *Genetics*, 77(1), pp. 71-94.

Choudhary, B., Kamak, M., Ratnakaran, N., Kumar, J., Awasthi, A., Li, C., Nguyen, K., Matsumoto, K., Hisamoto, N. and Koushika, S. P. (2017) 'UNC-16/JIP3 regulates early events in synaptic vesicle protein trafficking via LRK-1/LRRK2 and AP complexes', *PLOS Genetics*, 13(11), pp. e1007100.

Consortium, T. C. e. D. M. (2012) 'Large-Scale Screening for Targeted Knockouts in the *Caenorhabditis elegans* Genome', *G3 Genes/Genomes/Genetics*, 2(11), pp. 1415-1425.

Dwyer, N. D., Adler, C. E., Crump, J. G., L'Etoile, N. D. and Bargmann, C. I. (2001) 'Polarized Dendritic Transport and the AP-1  $\mu$ 1 Clathrin Adaptor UNC-101 Localize Odorant Receptors to Olfactory Cilia', *Neuron*, 31(2), pp. 277-287.

Kaplan, O. I., Molla-Herman, A., Cevik, S., Ghossoub, R., Kida, K., Kimura, Y., Jenkins, P., Martens, J. R., Setou, M., Benmerah, A. and Blacque, O. E. (2010) 'The AP-1 clathrin adaptor facilitates cilium formation and functions with RAB-8 in *C. elegans* ciliary membrane transport', *Journal of cell science*, 123(Pt 22), pp. 3966-3977.

Kumar, J., Choudhary, B. C., Metpally, R., Zheng, Q., Nonet, M. L., Ramanathan, S., Klopfenstein, D. R. and Koushika, S. P. (2010) 'The *Caenorhabditis elegans* Kinesin-3 Motor UNC-104/KIF1A Is Degraded upon Loss of Specific Binding to Cargo', *PLOS Genetics*, 6(11), pp. e1001200.

Lee, J., Jongeward, G. D. and Sternberg, P. W. (1994) 'unc-101, a gene required for many aspects of *Caenorhabditis elegans* development and behavior, encodes a clathrin-associated protein', *Genes Dev*, 8(1), pp. 60-73.

Maniar, T. A., Kaplan, M., Wang, G. J., Shen, K., Wei, L., Shaw, J. E., Koushika, S. P. and Bargmann, C. I. (2012) 'UNC-33 (CRMP) and ankyrin organize microtubules and localize kinesin to polarize axon-dendrite sorting', *Nature Neuroscience*, 15(1), pp. 48-56.

Nonet, M. L. (1999) 'Visualization of synaptic specializations in live *C. elegans* with synaptic vesicle protein-GFP fusions', (0165-0270 (Print)).

Sakaguchi-Nakashima, A., Meir, J. Y., Jin, Y., Matsumoto, K. and Hisamoto, N. (2007) 'LRK-1, a *C. elegans* PARK8-related kinase, regulates axonal-dendritic polarity of SV proteins', *Curr Biol*, 17(7), pp. 592-8.

Zhen, M. and Jin, Y. (1999) 'The liprin protein SYD-2 regulates the differentiation of presynaptic termini in *C. elegans*', *Nature*, 401(6751), pp. 371-375.

Edwards, S. L., Yu, S. C., Hoover, C. M., Phillips, B. C., Richmond, J. E. and Miller, K. G. (2013) 'An organelle gatekeeper function for *Caenorhabditis elegans* UNC-16 (JIP3) at the axon initial segment', *Genetics*, 194(1), pp. 143-61.

Zhao, H. and Nonet, M. L. (2001) 'A Conserved Mechanism of Synaptogyrin Localization', *Molecular biology of the cell*, vol. 12 (2001)(8), pp. 2275-89.
