# Supplementary figures and images for: Active zone protein SYD-2/Liprin-α acts downstream of LRK-1/LRRK2 to regulate polarized trafficking of synaptic vesicle precursors through clathrin adaptor protein complexes
Source: PubMed Central journal article supplement — bioRxiv. 2023 Feb 26:2023.02.26.530068. Preprint. [Version 1] doi: 10.1101/2023.02.26.530068 (PMC9980171; doi:10.1101/2023.02.26.530068), 2023-02-26

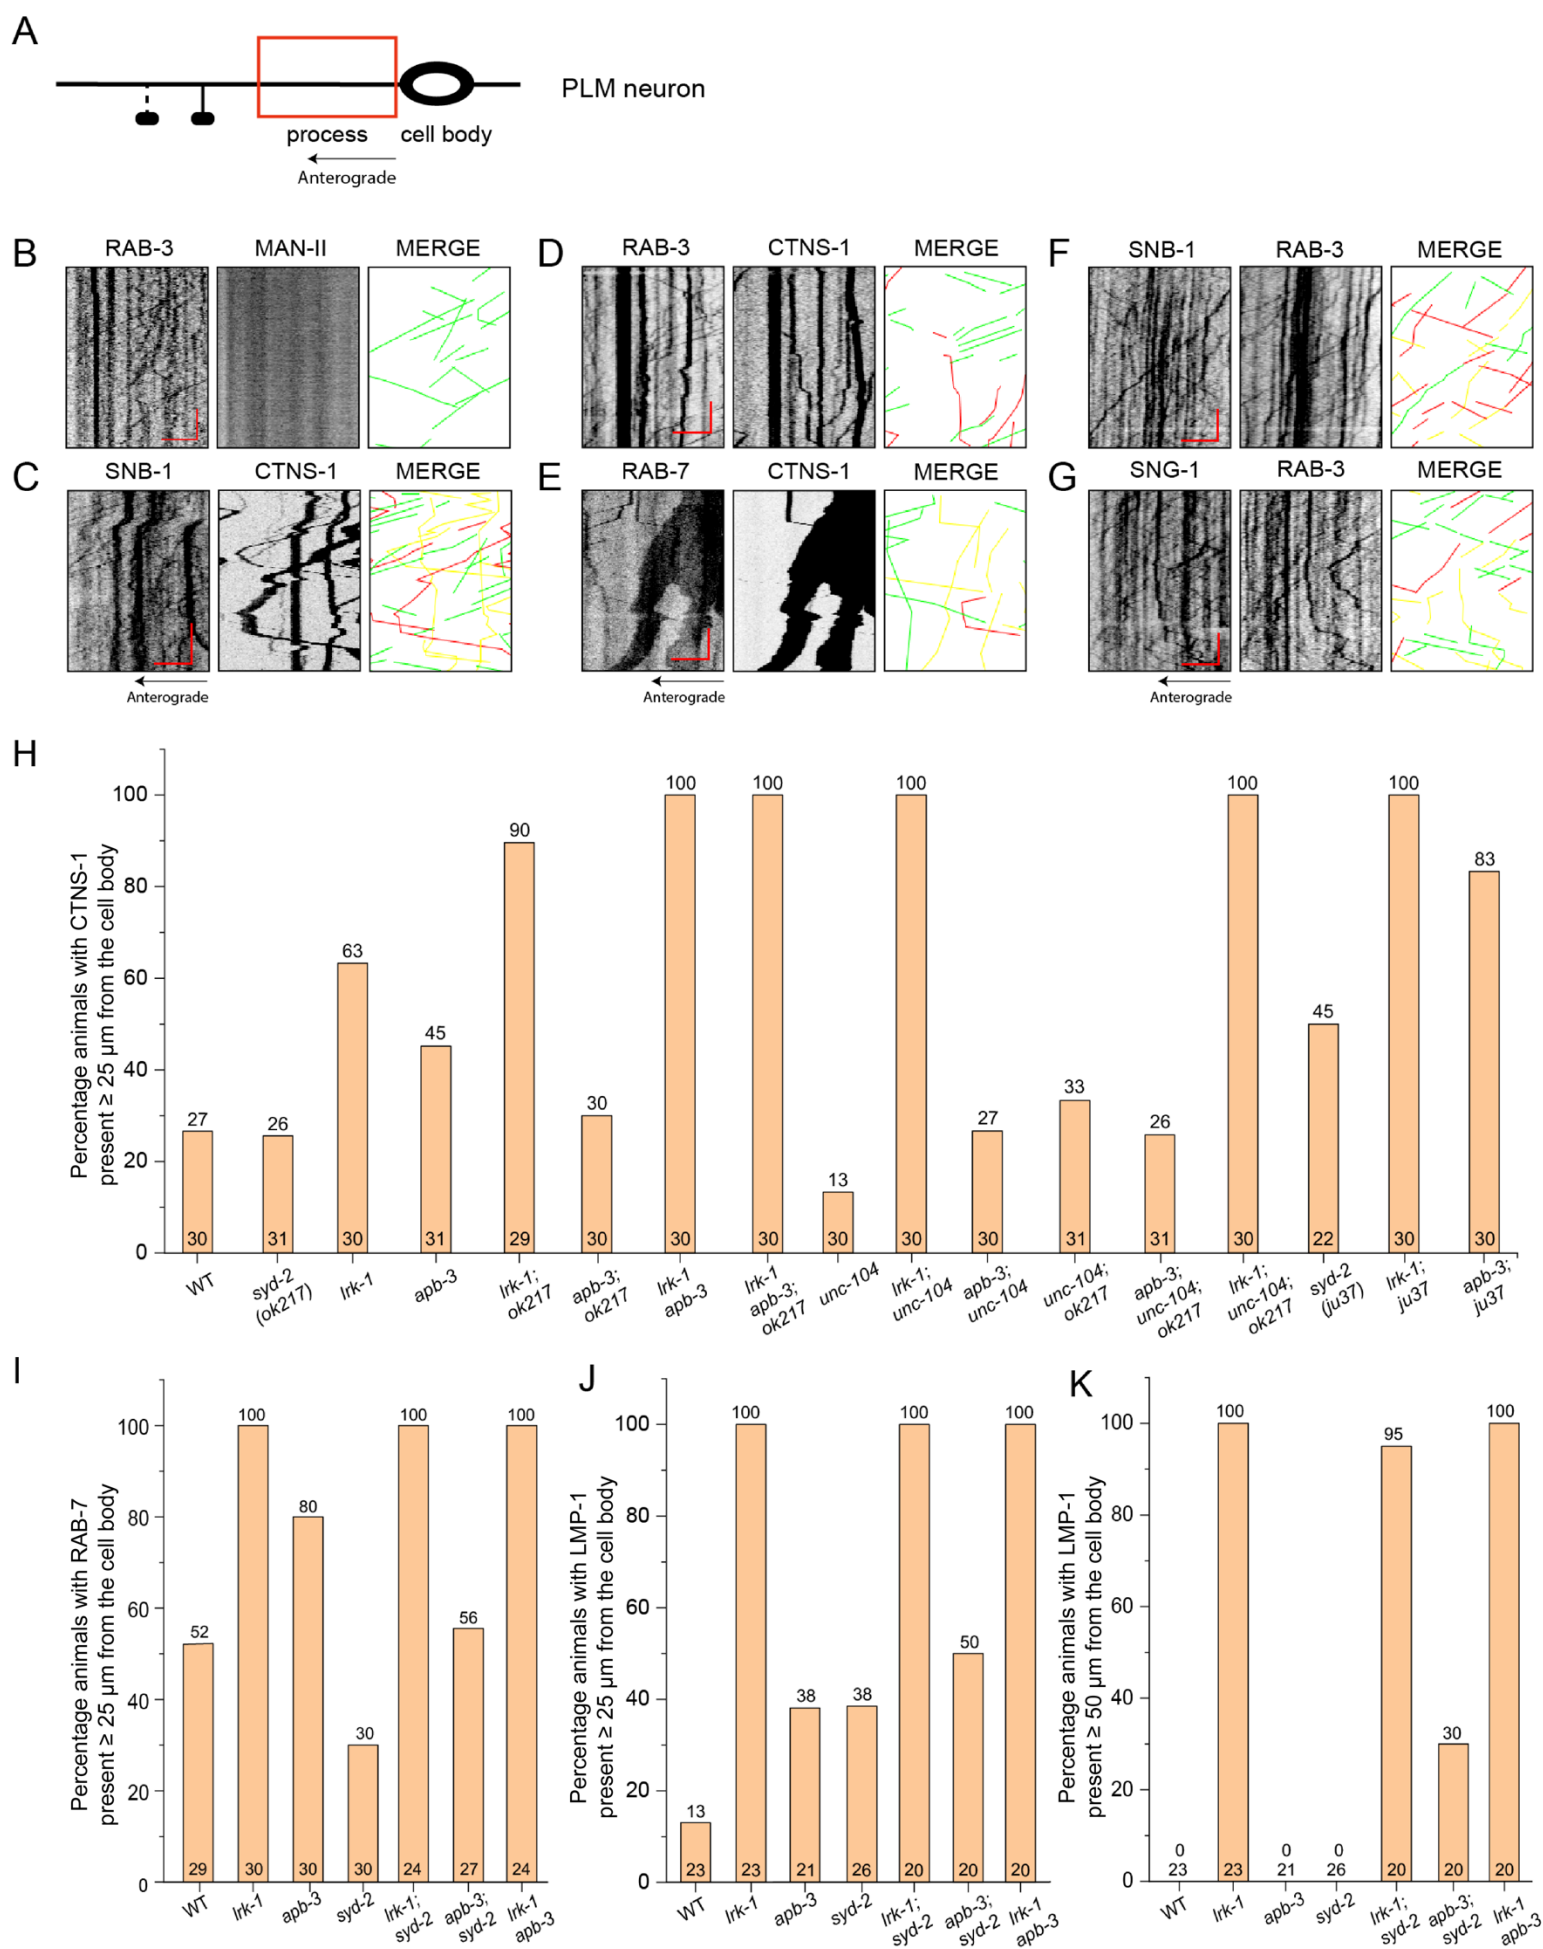

Supplementary Figure S1

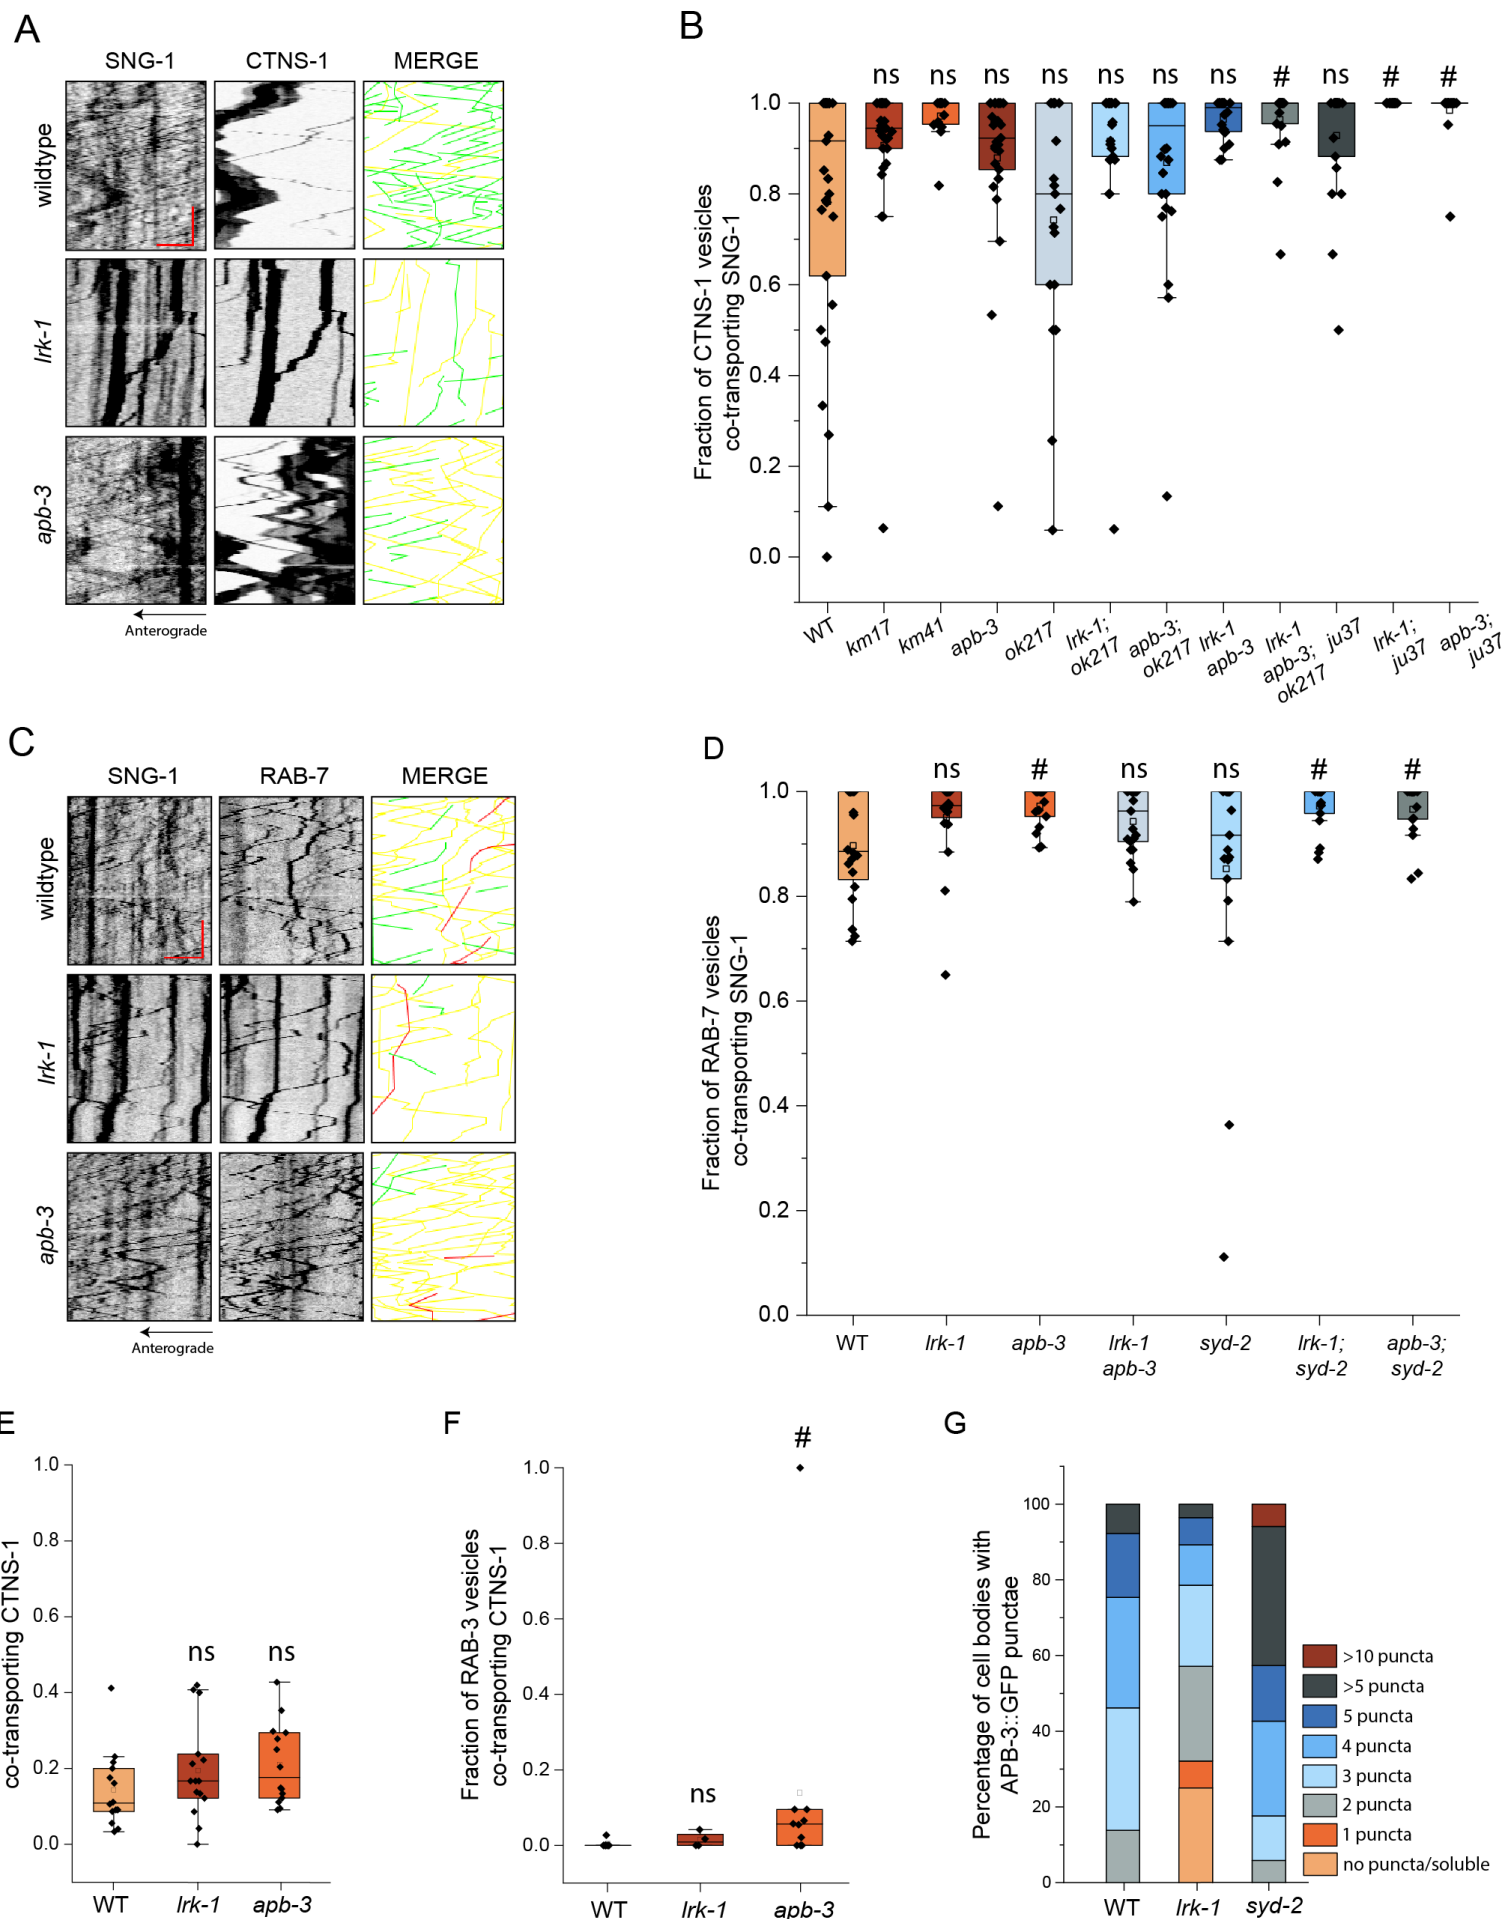

Supplementary Figure S2

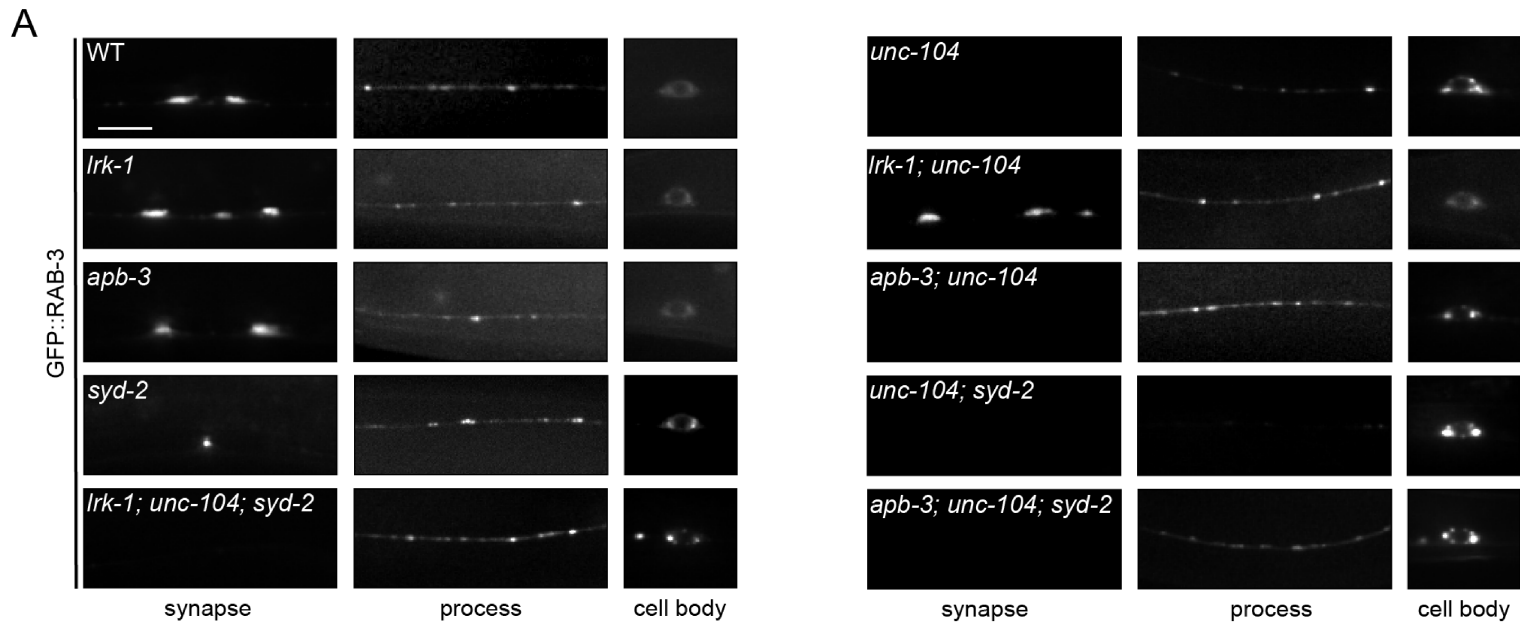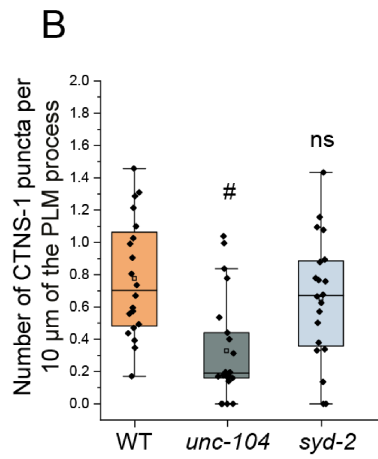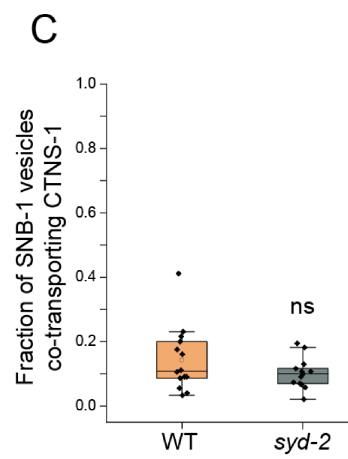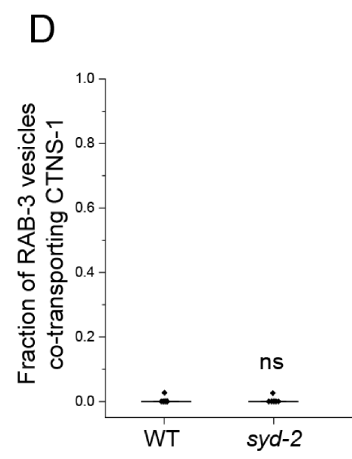

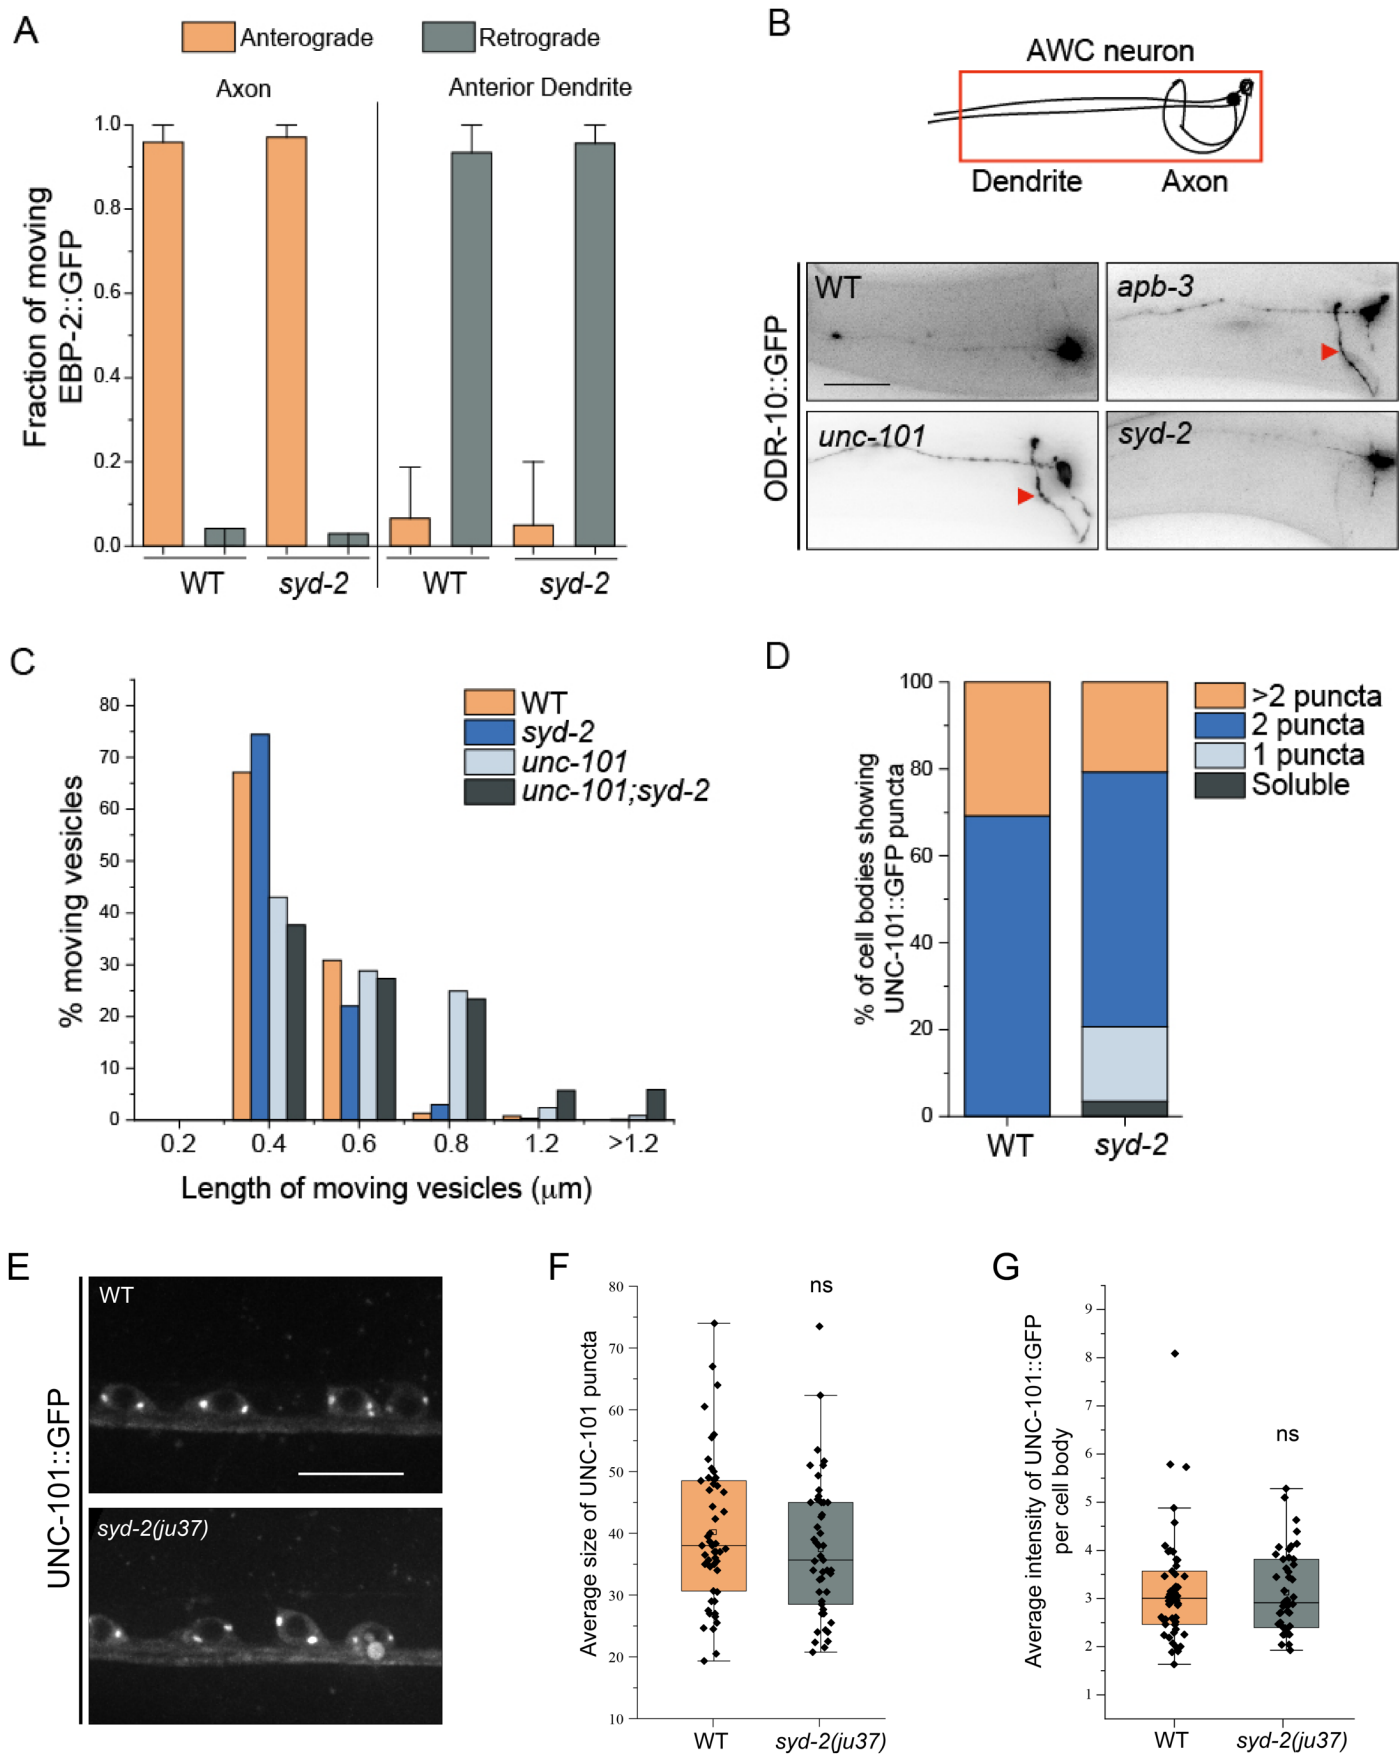

Supplement: NIHPP2023.02.26.530068v1-supplement-9.pdf [file NIHPP2023.02.26.530068v1-supplement-9.pdf]
